# Supplementary material for: Boosting the Zn-ion energy storage capability of graphene sandwiched nanoporous VOx derived from MXene
Source: Royal Society of Chemistry journal article supplement (doi:10.1039/d2nr01497a), 2022-01-01
Supplement: d2nr01497a1.pdf [file d2nr01497a1.pdf]

## Supplementary Material

# Boosting Zn-Ion Energy Storage Capability of Graphene Sandwiched Nanoporous VO<sub>x</sub> Derived From MXene

*Tao Chen<sup>a</sup>, Changyu Yang<sup>a</sup>, Xuewen Hu<sup>a</sup>, Qicheng Zhang<sup>a</sup>, An Cai<sup>a</sup>, Huibin Liu<sup>a</sup>,*

*Yang Li<sup>a</sup>, Wenchao Peng<sup>a</sup>, Fengbao Zhang<sup>a</sup>, Xiaobin Fan<sup>\*a,b,c</sup>*

<sup>a</sup>School of Chemical Engineering and Technology, State Key Laboratory of Chemical Engineering, Tianjin University, Tianjin, 300072, China

<sup>b</sup>Haihe Laboratory of Sustainable Chemical Transformations, Tianjin 300192, China

<sup>c</sup>Institute of Shaoxing, Tianjin University, Zhejiang 312300, China

\*E-mail: [xiaobinfan@tju.edu.cn](mailto:xiaobinfan@tju.edu.cn)

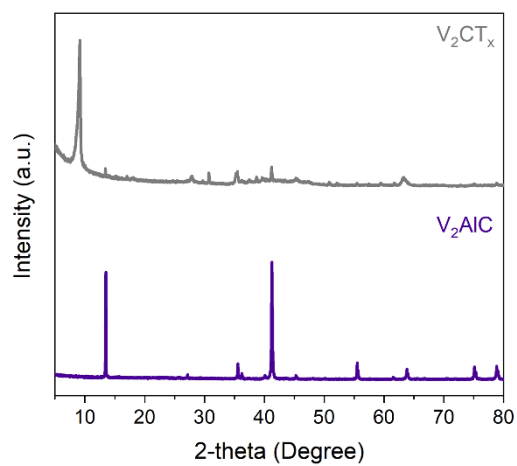

Fig. S1. XRD patterns of  $V_2AlC$  and  $V_2CT_x$ .

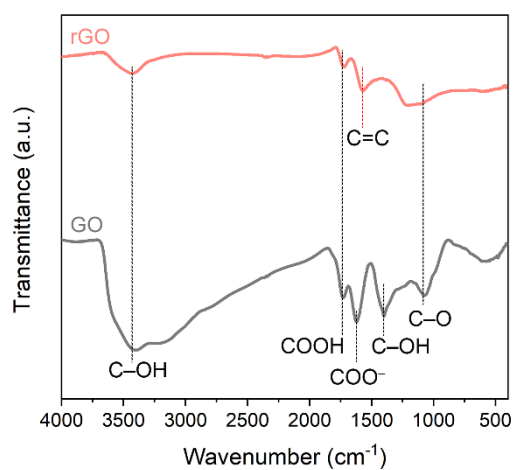

Fig. S2. FT-IR spectra of GO and rGO.

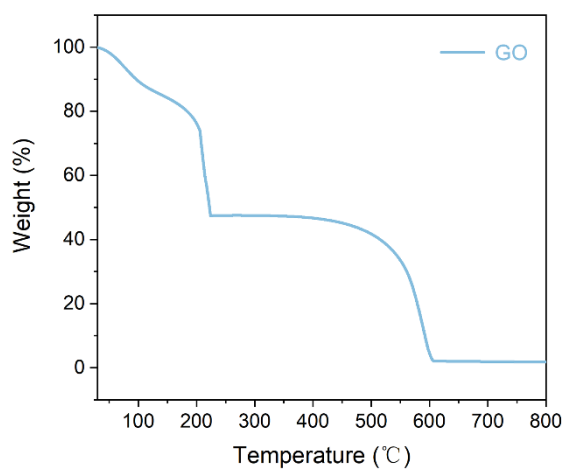

Fig. S3. TGA plot of GO annealing in air.

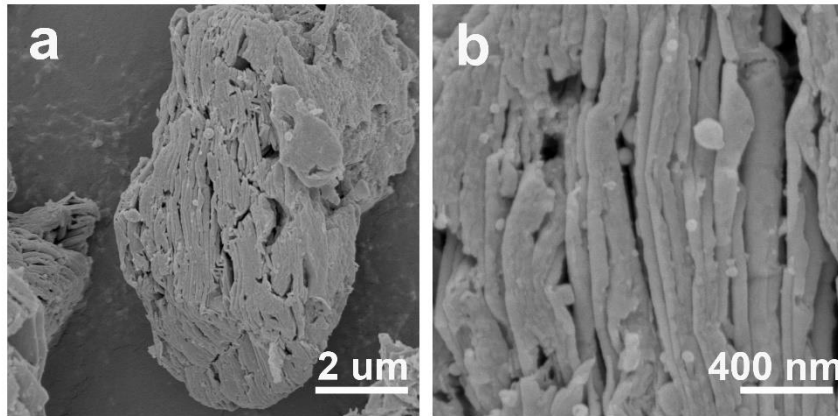

Fig. S4. SEM of  $V_2CT_x$ .

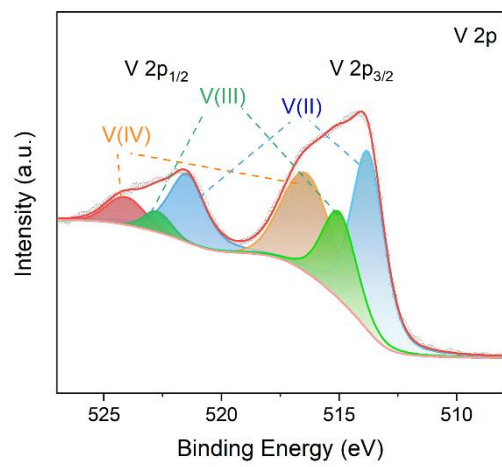

Fig. S5. V 2p XPS spectra of  $V_2CT_x$ .

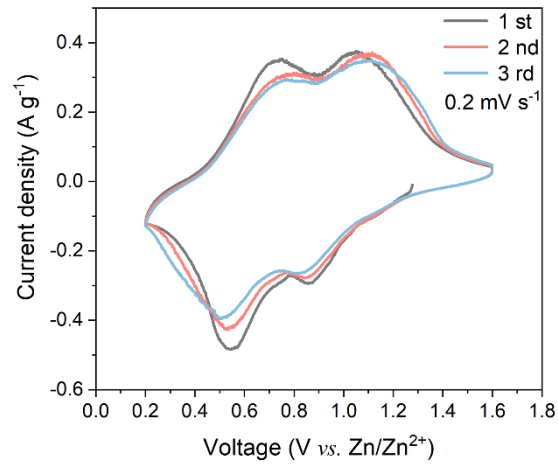

Fig.S6. CV curves for the first three cycles of VO<sub>x</sub>.

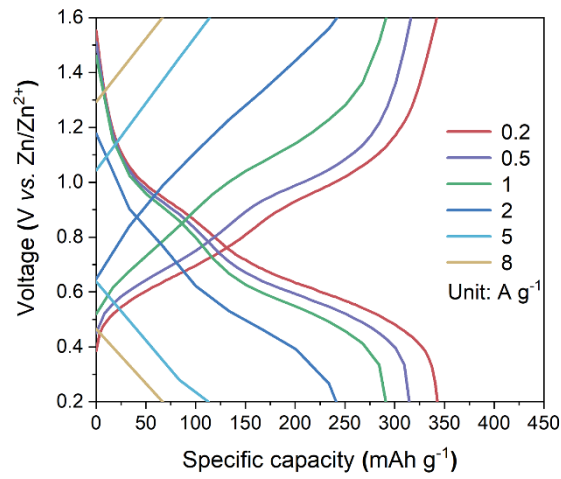

Fig. S7. Charge and discharge curves at the current density from 0.2 to 8.0 A g<sup>-1</sup>.

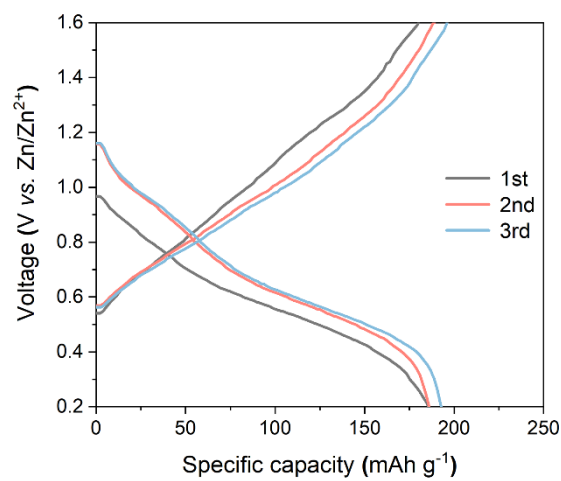

Fig. S8. The GCD curves of the first three cycles at 0.5 A g<sup>-1</sup>.

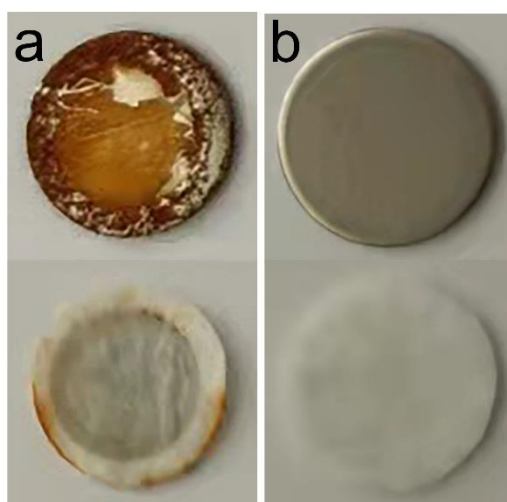

Figure S9. Photographs showing separators disassembled after 200 cycles of (a)  $\text{VO}_x$  and (b)  $\text{rGO-VO}_x$  cells.

**Table S1.** ICP-MS result of dissolved V in the electrolyte after 200 cycles.

| Sample                                         | $\text{VO}_x$ | $\text{rGO-VO}_x$ |
|------------------------------------------------|---------------|-------------------|
| Dissolved V ( $\text{mg L}^{-1}$ ) after 200th | 4.417         | 0.0183            |

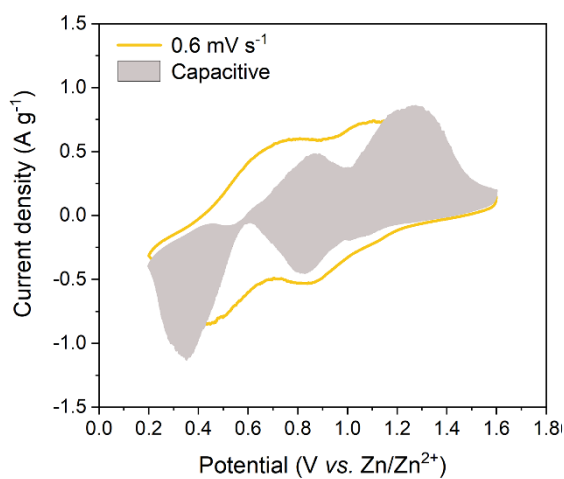

Fig. S10. CV curve displaying the capacitive contribution (gray region) to the total current at  $0.6 \text{ mV s}^{-1}$ .

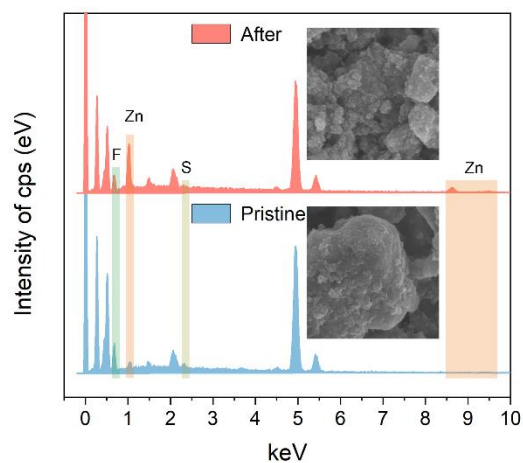

Fig. S11. SEM images (inset) and corresponding EDX of rGO-VO<sub>x</sub> composite electrode before and after long cycling.

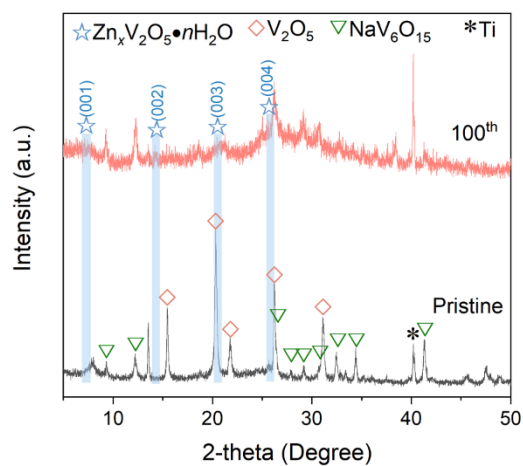

Fig. S12. XRD of rGO-VO<sub>x</sub> composite electrode before and after long cycling.

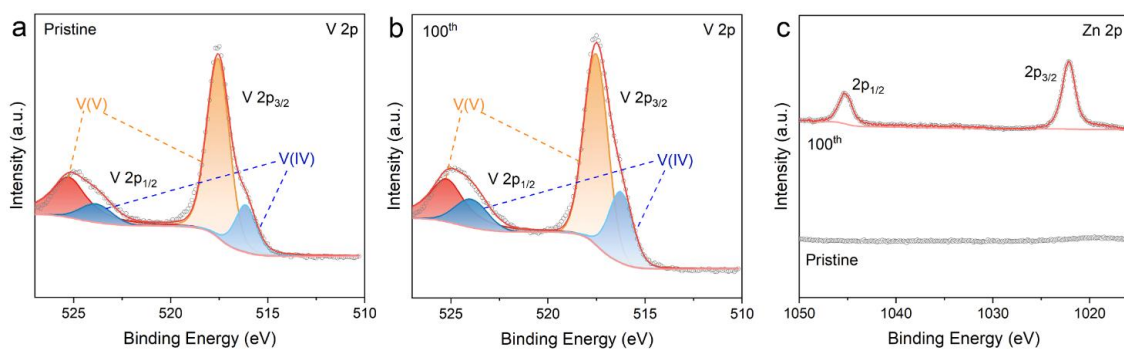

Fig. S13. XPS of rGO-VO<sub>x</sub> composite electrode before and after long cycling.
